# Supplementary material for: Aspartate Decarboxylase is Required for a Normal Pupa Pigmentation Pattern in the Silkworm, Bombyx mori
Source: PubMed Central journal article supplement (PMC4468592; doi:10.1038/srep10885), 2015-06-16
Supplement: srep10885-s1.pdf [file srep10885-s1.pdf]

## Supplementary information

### Aspartate Decarboxylase is Required for a Normal Pupa Pigmentation Pattern in the Silkworm, *Bombyx mori*

Fangyin Dai<sup>1,2\*</sup>, Liang Qiao<sup>1,3\*</sup>, Cun Cao<sup>1,2\*</sup>, Xiaofan Liu<sup>1,2\*</sup>, Xiaoling Tong<sup>1,2</sup>, Songzhen He<sup>1,2</sup>, Hai Hu<sup>1,2</sup>, Li Zhang<sup>1,2</sup>, Songyuan Wu<sup>1,2</sup>, Duan Tan<sup>1,2</sup>, Zhonghuai Xiang<sup>1,2</sup>, Cheng Lu<sup>1,2</sup>

<sup>1</sup>State Key Laboratory of Silkworm Genome Biology, College of Biotechnology, Southwest University, Chongqing, 400716, China

<sup>2</sup>Key Laboratory for Sericulture Functional Genomics and Biotechnology of Agricultural Ministry, Southwest University, Chongqing 400716, China

<sup>3</sup>Institute of Entomology and Molecular Biology, College of Life Sciences, Chongqing Normal University, Chongqing 401331, China

\*These authors contributed equally to this work.

To whom correspondence should be addressed: Fangyin Dai, State Key Laboratory of Silkworm Genome Biology, College of Biotechnology, Southwest University, Chongqing, 400716 China, Tel: +86-23-68250793, Fax: +86-23-68251128, e-mail address: fydai@swu.edu.cn, or Cheng Lu, State Key Laboratory of Silkworm Genome Biology, Southwest University, Chongqing, China, e-mail address: lucheng@swu.edu.cn.

Running title: Repression of *BmADC* for silkworm *black pupa* mutants

#### 5 Supplementary Figures

#### 3 Supplementary Tables

#### Supplementary Figure legends

Figure S1. (A) Alignment of BGIBMGA012088 and orthologs among several insect species. The red line represents the Pyridoxal Phosphate domain. The protein sequences used for Alignment were listed as follow: *Danaus plexippus* EHI66406.1, *Bombyx mori* BGIBMGA012088, *Biston betularia* AEP43793.2, *Papilio xuthus* BAI87832.1, *Bicyclus anynana* AEQ77286.1, *Manduca sexta* Msex2.11697-RA, *Tribolium castaneum* ABX89951.1, *Drosophila melanogaster* NP\_476788.1. (B) A neighbor-joining phylogenetic tree of amino acid decarboxylase with Pyridoxal Phosphate domain based on their amino acid sequences, with bootstrap values from 1000 replications. The numbers on the branches represent the bootstrap values. Bm=*Bombyx mori*, Dm=*Drosophila melanogaster*, Tc=*Tribolium castaneum*. (C) Predicted tertiary structure of BmADC between wild-type and *bp* mutant.

Figure S2. Phenotype of Dazao (wild-type) and 16-100 (*bp* mutant) at larvae and moth stage. (A) Phenotype of Dazao and 16-100 on day 3 of the 5<sup>th</sup> instar larvae. a, b represent the dorsal side phenotype of wide-type (Dazao) on day 3 of the 5<sup>th</sup> instar larvae, respectively; c, d represent the ventral side phenotype of 16-100 day 3 of the 5<sup>th</sup> instar larvae, respectively. Scale bar: 1 cm. (B) Phenotype of Dazao and 16-100 at the first day of the moth stage. a, b represent the dorsal side phenotype of Dazao and 16-100 at the first day of the moth stage, respectively; c, d represent the ventral side phenotype of Dazao and 16-100 at the first day of the moth stage, respectively. Scale bar: 1 cm.

Figure S3. The retention times of amino acids and catecholamine standards. (A) The retention times of

Aspartate and  $\beta$ -alanine standards (aspartate 11.76 min;  $\beta$ -alanine, 59.27 min). (B) The retention times of Dopamine and NBAD standards (Dopamine, 8.065 min; NBAD, 18.404 min).

Figure S4. Expression patterns of  $\beta$ -alanine synthesis and melanin metabolism genes during several developmental stages. (A) In Dazao strain, Expression patterns of  $\beta$ -alanine pathway rate-limiting enzyme genes, *BmADC* and *BmDYPD*, during different development stages. 4M: the 4<sup>th</sup> molting stage; V: the 5<sup>th</sup> instar larvae stage; W: the wandering stage; P: the pupal stage; M0: day 1 of the moth stages. (B) In Dazao strain, the relative expression level of *Bmebony* and *BmaaNAT* (both of them contribute to Dopamine consumption) during the pupal-adult stage. P: pupal stage; M0: day 1 of the moth stages.

Figure S5. The pupae color pattern and the relative expression levels of *BmADC* between Dazao and 16-100 in different temperature conditions. (A) The schematic diagram of HSF (Heating shock factor) binding site on upstream sequence (~6.3 kb) of the transcriptional start site of *BmADC*. The red boxes represent HSF binding sites. The green box represents the SINE-like insertion in the bp mutant. (B ) a, b, c represent the dorsal side phenotype of Dazao at 6 h of pupation three different temperature conditions (20°C, 24°C and 30°C). d, e, f represents the dorsal side phenotype of 16-100 at 6 h of pupation in three different temperature conditions (20°C, 24°C and 30°C). Scale bar: 1 cm. (C) Relative expression levels of *BmADC* between Dazao and 16-100 at 6 h of pupation in different temperatures (20°C, 24°C and 30°C). (Student's t-test, n=3, \*\*, p<0.01. Data are presented as mean $\pm$ SD).

Figure S1

A

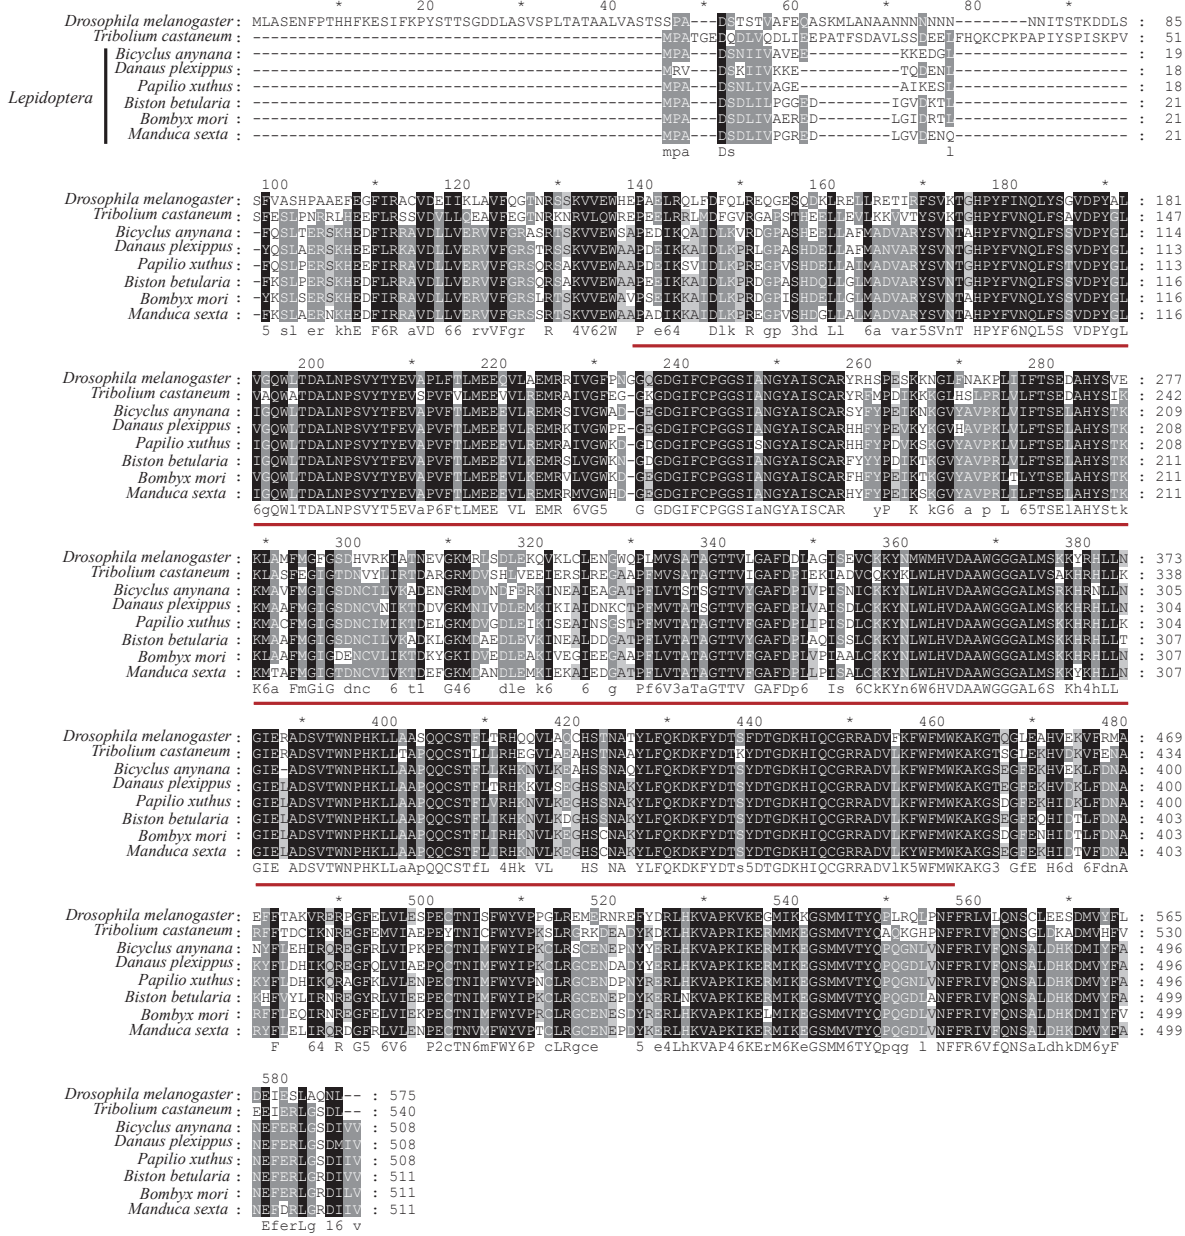

B

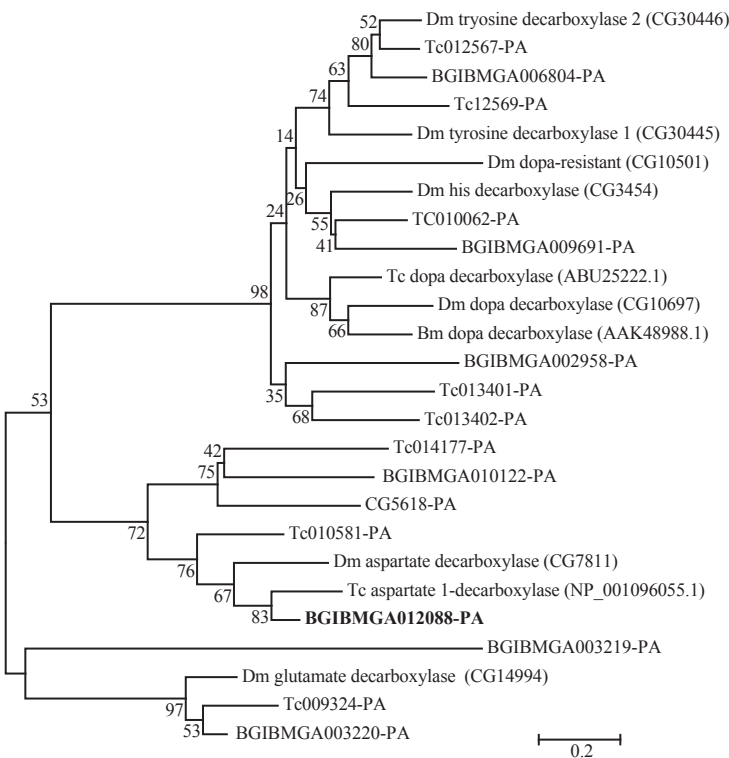

C

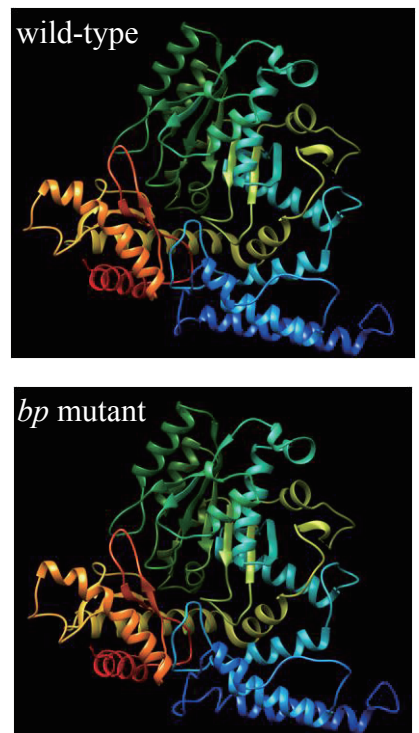

Figure S2

**A**

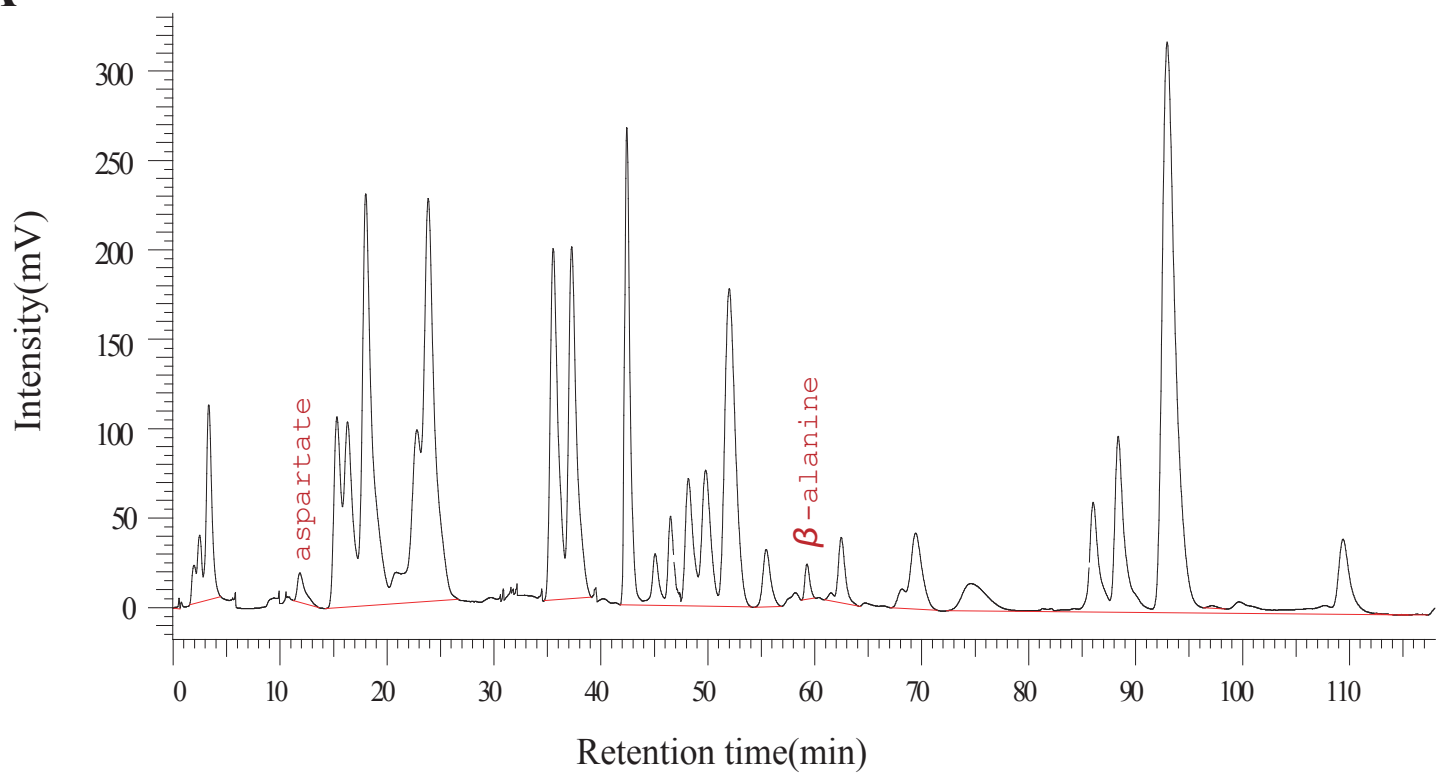

**B**

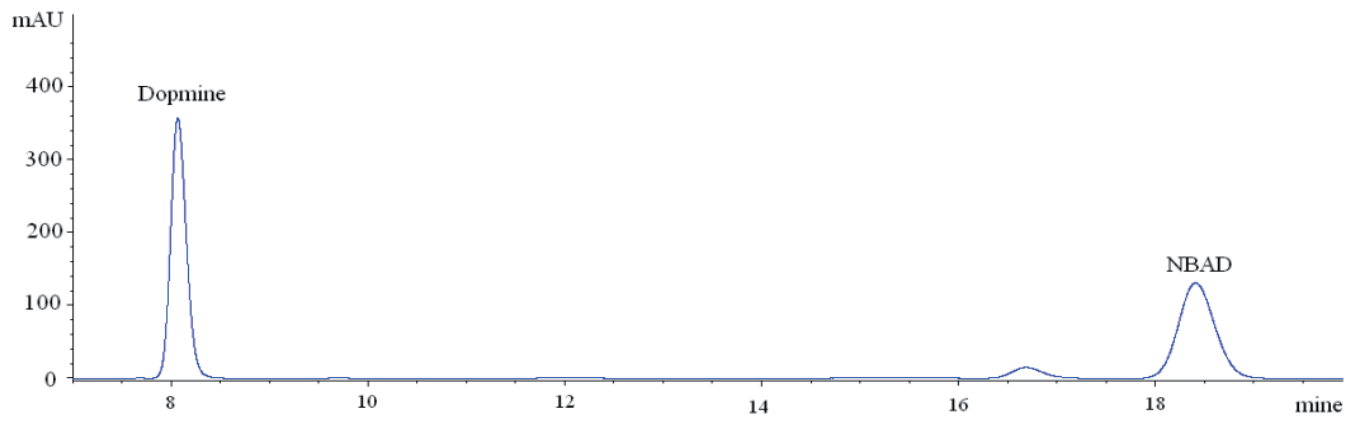

Figure S3

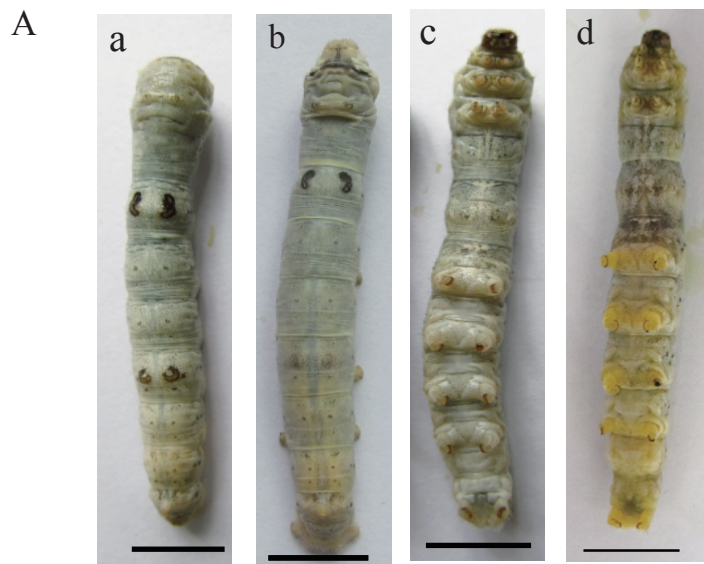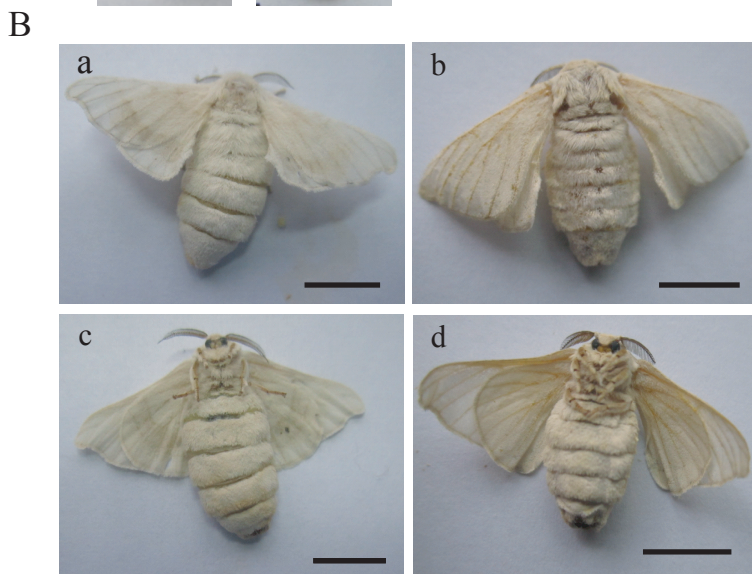

Figure S4

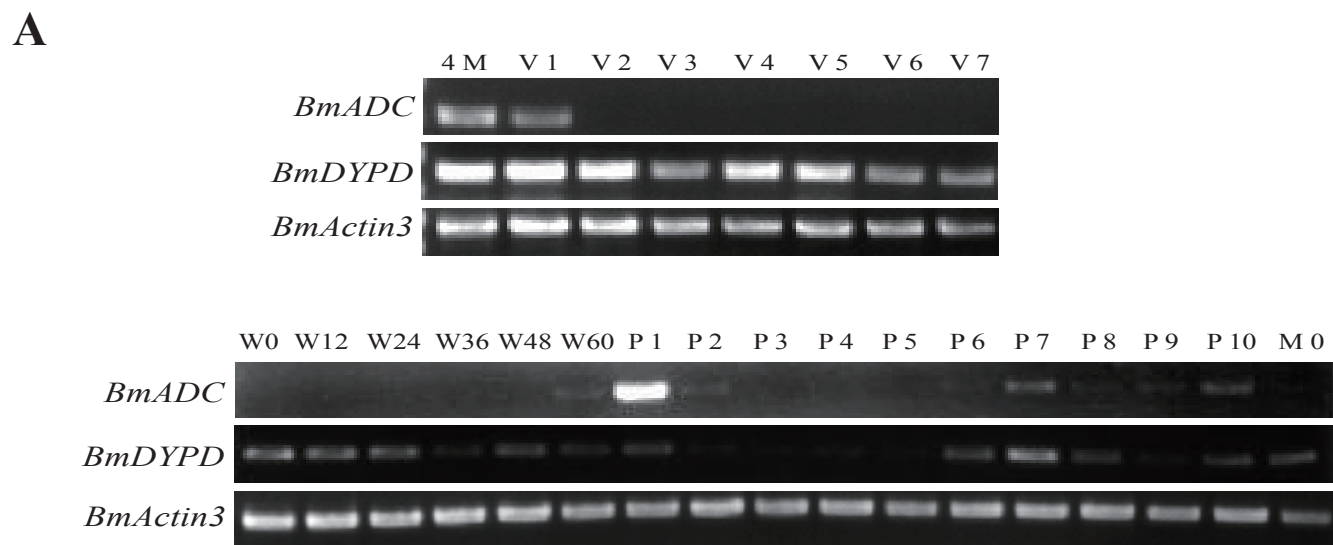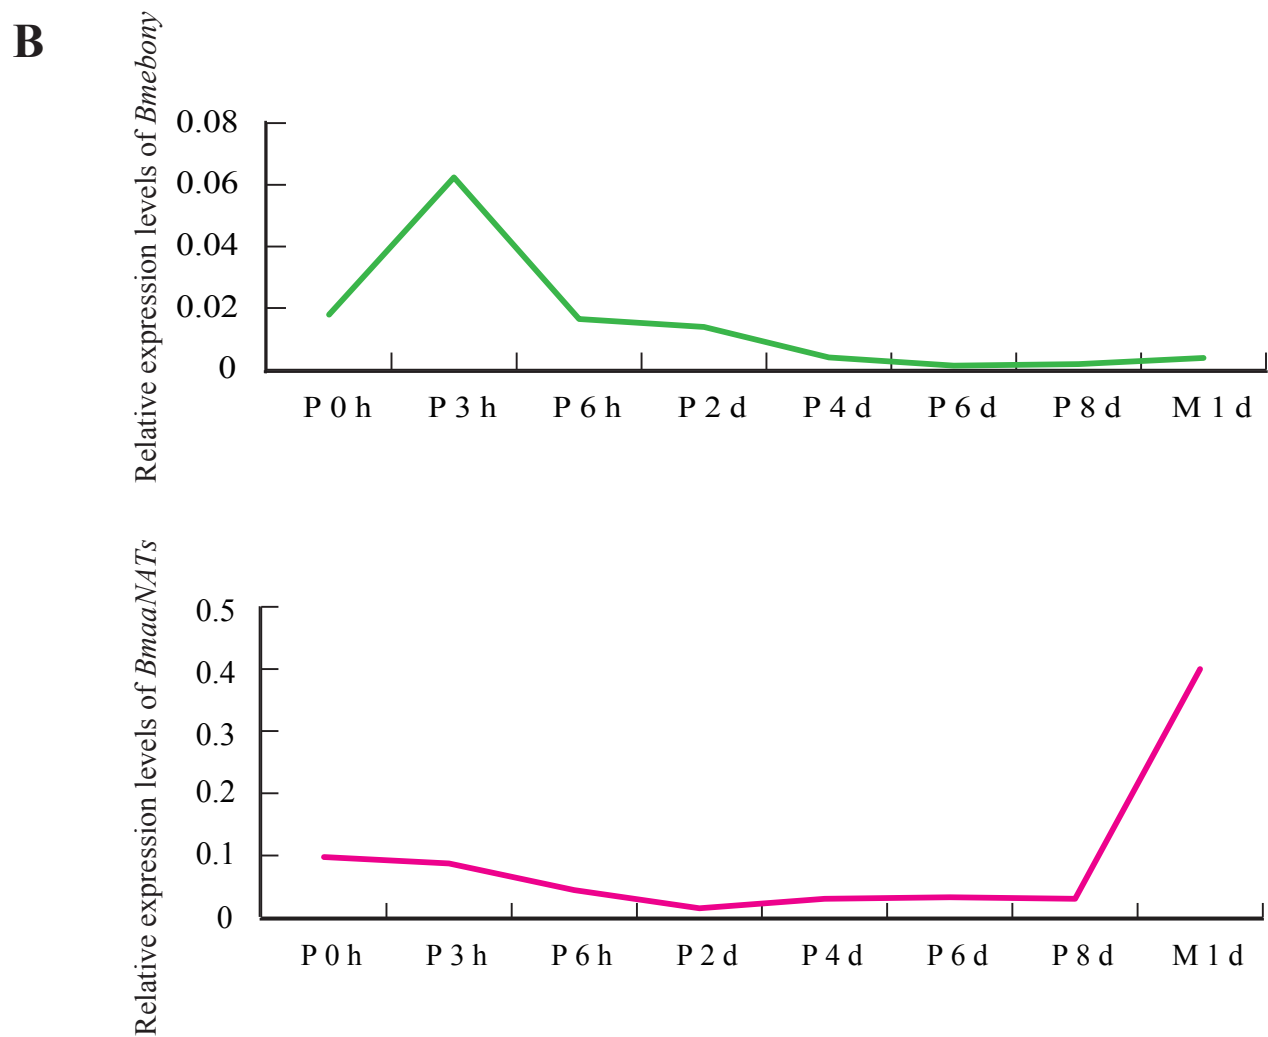

Figure S5

A

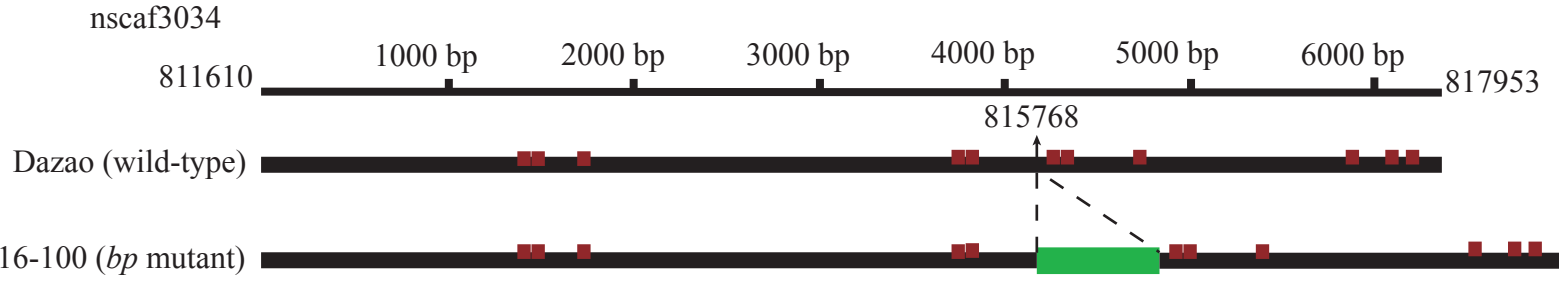

B

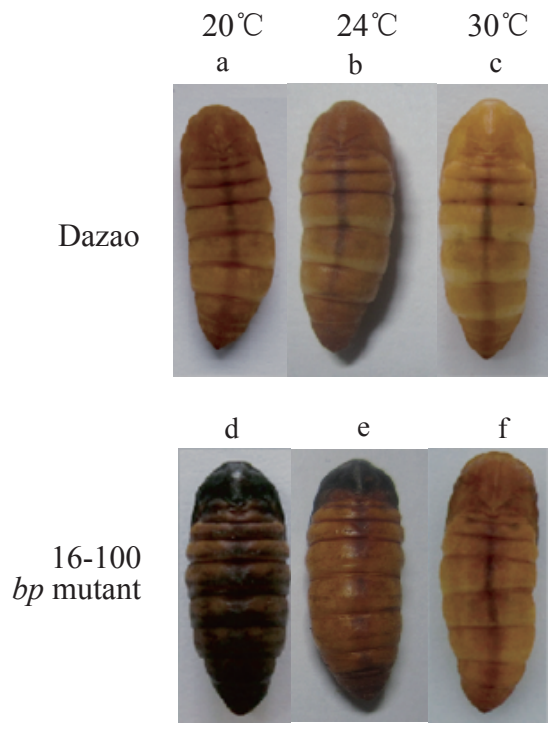

C

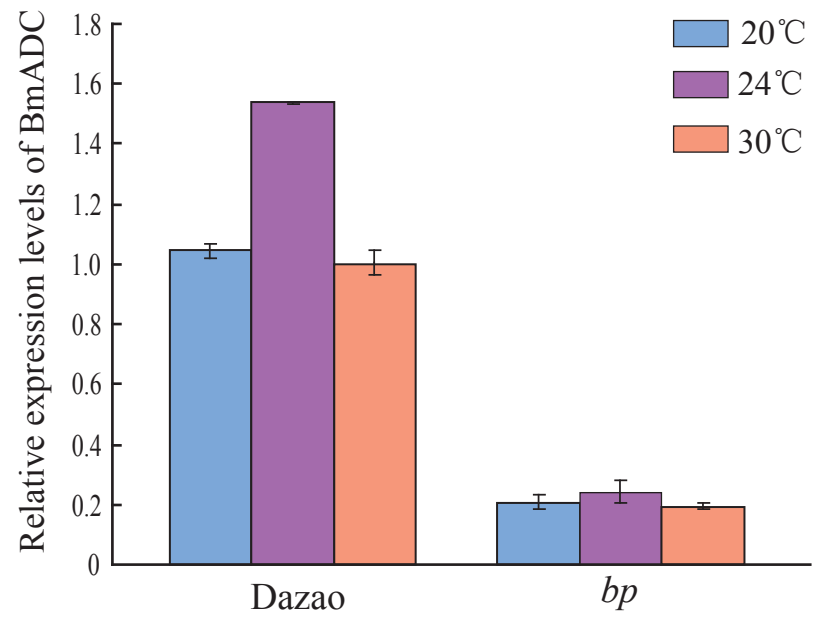

Table S1. Primers used in this study.

| Primer name    | Sense (5'-3')                                 | Anti-sense (5'-3')                          |
|----------------|-----------------------------------------------|---------------------------------------------|
| mapping S1101  | CGACTCACTCCTTTTATTTATTGACTCT                  | CGGATCGAGTACTGCAATGCG                       |
| mapping S1102  | AAAAGAAATGGCTGAACCAATAA                       | GGAGTTAGAACGAACGCCACG                       |
| mapping S1103  | ATCTFCCCTTCGTCGTATA                           | CGGTGCTGATGCATGGGTAAC                       |
| mapping S1104  | GTCCCAAATGTTGTTTCGG                           | CGTTAGGGTGAAGCTGAAATAGG                     |
| mapping S1105  | TTAGATAGGCAGACAACGGCG                         | TTGCCATTTACCCTCCG                           |
| mapping S1106  | GCCGTGCTGGACATAGGACTT                         | CCAGTCATCTTGAATGCGTIT                       |
| mapping S1107  | GTCCGCTAAATACTTATTGTTACGAAA                   | TTTGAAGGGATTTCATTAGCG                       |
| mapping S1108  | TTGAAGATAGAGCGAAGTGGAGG                       | GCGCAGAAAATAGGACGGT                         |
| mapping S1109  | CAAATATCCGTAAGTCCCCAG                         | CGACCCTACCTAAAGTGGGATAAGA                   |
| mapping S1110  | CGGTGGCAGAAGGTCATC                            | TCATGAGGTCCGGAATTTAAGTAA                    |
| mapping S1111  | AACCTGTGAGCTGACCTAACC                         | AACAAGATAGTCCGCAACCAG                       |
| mapping S1112  | TATGCCAAGGTGTTTCGACGG                         | AATTTGCTCATAAACCCCGG                        |
| mapping S1113  | GGAGTAAAATCGCCGCATA                           | AACTCCTTCGACATCTCCGTAC                      |
| mapping S1114  | TCCTAGTTCCGACCCCGTATCT                        | CGATTATAGAACTTTAGCAGAAGTGTATCT              |
| mapping S1115  | CCCTCAACCAGATGCAGCGA                          | ACCGTTATAGATGCTAAAGATATGATTGT               |
| mapping S1116  | TTTTAGTGTAGGGCACAATTCCAA                      | TAGCGATAAGACCCTATTGTAC                      |
| mapping S1117  | GCCACCAGTAAAAGCCTGAAGA                        | GGGTGTTGTTAGACAGGCCG                        |
| mapping S1118  | ACGGCAGCACACGCATAAAC                          | GCACTAGTGTACGACGGCAATC                      |
| mapping S1119  | AAAACACGGTGGTGCAACGC                          | CTA CAA AAT ACC ATT ACT GAC ACC GA          |
| mapping S1120  | CTTCACTGCTCGCGTCCC                            | GAGGCTTTCGTGCCAATGAG                        |
| mapping S1121  | GGAGAGGTGTTAGGTTGTTTCGT                       | CAGCAGCGAGCGGTCCC                           |
| mapping S1122  | TCTCATACCTGGCTTACCACGTT                       | GAAATGGTAGTGCAAGGTAGAGGG                    |
| mapping S1123  | 5'-GATTACCATCTAATTC AACACCG-3'                | 5'-TGCAGTACTCGCTCCTCG-3'                    |
| mapping S1124  | CGGACAGCTATAAATTGTACCATCG                     | CGATAAGACCCCTATTGCAC                        |
| mapping S1125  | CAGAATCAAATACGTGCCCTCAGTT                     | GGAGGAGCGTTTGCGTGTTA                        |
| mapping S1126  | GGAATAAGGTGCGCAAAGGTG                         | CCACTGCACCAGACACGACTG                       |
| mapping S1127  | AAATTCATACCTCCGTCGG                           | CATTTCACCACGCCAAACGAT                       |
| mapping S1128  | CACGCCTGAAGTTGATTGGAT                         | GCGTGGTATGGGTATGTGATGC                      |
| mapping S1129  | TTTATCGCCAATACCAGTCCAA                        | GATAGATTAGATTGGGTTAAGTCGTGA                 |
| mapping S1130  | TGCGGGAGGCTGGGG                               | CACGACGCACGTAGTTCCG                         |
| mapping S1131  | TTGATAGAAGAGGGATGAAGCAGTT                     | TTGAGACTATCGCCAACTGCC                       |
| mapping S1132  | ACATTACTAGTTTCGCTGTTCTGT                      | GGACATCGCCAAGGGACG                          |
| mapping S1133  | CGGTCTTTGCTTTAGCGATA                          | CAGCGGTCCGGTTTCAGTTT                        |
| mapping S1134  | ATGACACGGTGCAGCGAAA                           | CCCGTGTCCATAGATGAAGCG                       |
| mapping S1135  | CGGCTTTGCTATTGTTTACTTAC                       | CCAGTTTACATGACCCAAATTTAGAT                  |
| mapping S1136  | GATTTCCATCAGAGTAACGGGTG                       | TCTGCATTTGGATATCAGCGAG                      |
| mapping S1137  | TTGCTCTGAGCGATAAGACTGC                        | TGAGCCTGTATTCCATGAAAACG                     |
| mapping S1138  | CCCAGAGTGAGACTGCTCCATT                        | TTGTTACTCACTGAGGGTCGGG                      |
| mapping S1139  | TGGTGGCGTAGAAGCCTTGTA                         | GAAACGCTTGACTGGAAGAGGT                      |
| mapping S1140  | GCCACAAATAAAGATTACCGTAGCTC                    | TGCGTAAAAGCCGATATGTG                        |
| mapping M1     | CCACATCATTTGTTATGCACTCT                       | AAGGTTAAGTGCCTAAGGGTAT                      |
| mapping M2     | ACGGCGTCACCTTTGCTTT                           | AGCCGAGAACTCAGCAGGT                         |
| mapping M3     | GTTGGCGTTACTTATCCGTGTT                        | GTGCTGGCTACCTGACCTG                         |
| mapping M4     | TGGGCTTTC AAGTCCTGG                           | TGCCCTATTGCTTACTGATG                        |
| ADC-ORF        | AAGTAGATCACGATGCCCTG                          | AGATGCGAGATTTTTTGTGA                        |
| 5'-ADC         | CGACTGGAGCACGAGGACACTGA                       | CCATACGGGTCCACGGATGAATAC                    |
| 5'Nested-ADC   | GGACACTGACATGGACTGAAGGAGTA                    | CGAACACTACCCTTTC AACAGCA                    |
| 3'-ADC         | GCTGTCAACGATACGCTACGTAACG                     | ACGACGGGCGGATGTCTCAAAT                      |
| 3' Nested -ADC | CGCTACGTAACGGCATGACAGTG                       | TCCCCGATGGTAACTTATCAGCCTCA                  |
| RT-PCR-BmADC   | GCATCAGTTGTTATTCATCCGTGG                      | TCGCTATGGGGACTAATGGGT                       |
| RT-PCR-BmDYPD  | CGAGAACTACGGTCCAGGTCA                         | CTTCATAAGCAGCCACAGCG                        |
| BmActin3       | CATGAAGATCCTCACCAGCG                          | CGTAGCACAGCTTCTCCTTGATA                     |
| qRT-BmADC      | GTGGGCGGATGTCTCAA                             | GCAAGCCTTCCCATTACG                          |
| qRT-BmDDC      | AGCCTTGGACTGCGGTGAT                           | ATAGCGGGATACGAGTTAGCG                       |
| qRT-Bmebony    | GACGCCAGGTCAAGATTTCG                          | CGTAGCATAGCACCACGACT                        |
| sw22934        | TTCGTACTGCTCTTCTCGT                           | CAAAGTTGATAGCAATTCCT                        |
| dsBmADC1       | TAATACGACTCACTATAGGGAGAATTGCCAACGGTTATGCCA    | TAATACGACTCACTATAGGGAGACGAAGCCTTCCCATTACG   |
| dsBmADC2       | TAATACGACTCACTATAGGGAGAACCCTAATGGAGGAAGAAGTGC | TAATACGACTCACTATAGGGAGAGTGGAGCATTGTTGAGGAGC |
| dsRed          | TAATACGACTCACTATAGGGAGACTTCAAGGTGCGCATGGAG    | TAATACGACTCACTATAGGGAGATGTGGATCTCGCCCTTACG  |



**Table S2. Statistic of RNAi**

| Treatment      | Injected | Death | Pupation | Melanism | Efficiency |
|----------------|----------|-------|----------|----------|------------|
| <i>dsBmADC</i> | 40       | 10    | 30       | 17       | 56.7%      |
| <i>dsRed</i>   | 23       | 5     | 18       | 0        | 0%         |

**Table S3. Statistic of  $\beta$ -alanine treatment**

---

| Treatment        | Injected | Death | Pupation | Revert to wild-type | Efficiency |
|------------------|----------|-------|----------|---------------------|------------|
| $\beta$ -alanine | 72       | 9     | 63       | 42                  | 66.7%      |
| saline           | 24       | 3     | 21       | 0                   | 0%         |

---
